# Supplementary material for: Gene expression network analyses in response to air pollution exposures in the trucking industry
Source: PubMed Central journal article supplement (PMC5093980; doi:10.1186/s12940-016-0187-z), 2016-11-03

**PM2 Permutation, lambda=1.152**

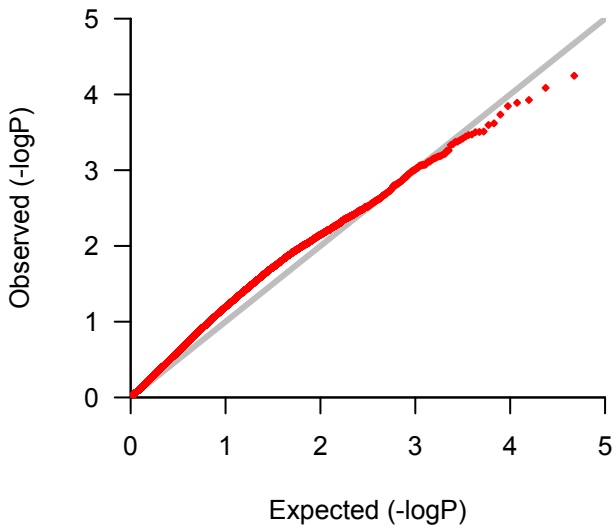

**OC Permutation, lambda=1.395**

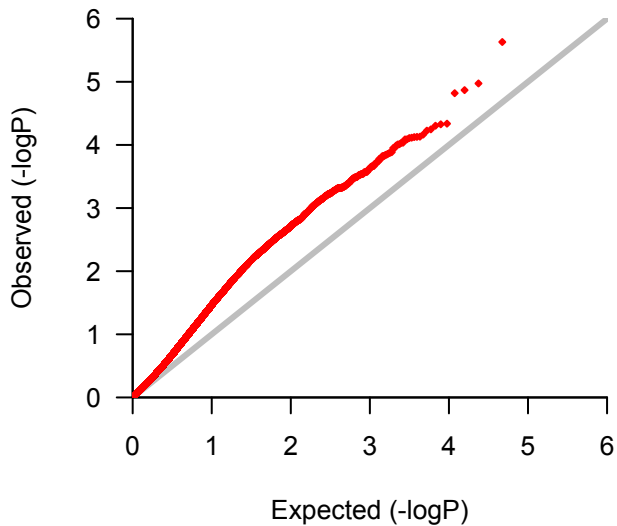

**EC Permutation, lambda=1.092**

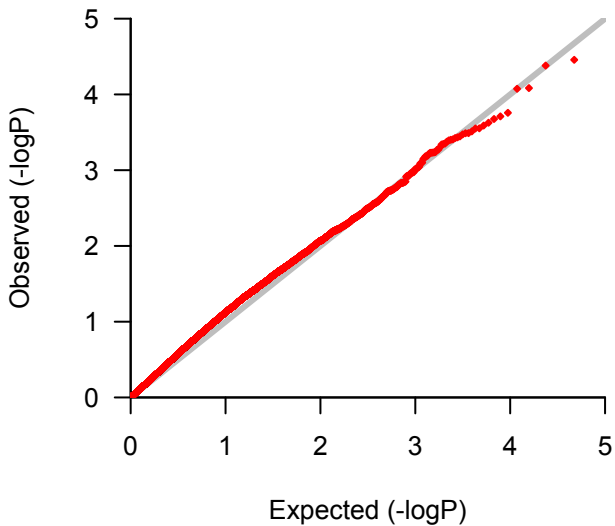

Supplement: 12940_2016_187_MOESM1_ESM.pdf [file 12940_2016_187_MOESM1_ESM.pdf]
